# Supplementary material
Source: PubMed Central journal article supplement (PMC4814315)
Supplement: NIHMS755207-supplement-Table_S1.pdf [file NIHMS755207-supplement-Table_S1.pdf]

Supplemental Table 1. List of significantly altered tendon proteins after injury and repair.

| Protein Name                                                                 | Gene Symbol | Accession Number       | Molecular Weight (kDa) | Total Spectrum Count_Mean |                   |                  | Total Spectrum Count_SD |             |           |
|------------------------------------------------------------------------------|-------------|------------------------|------------------------|---------------------------|-------------------|------------------|-------------------------|-------------|-----------|
|                                                                              |             |                        |                        | Normal (N=3)              | Repair-only (N=3) | ASC+BMP 12 (N=3) | Normal                  | Repair-only | ASC+BMP12 |
| 40S ribosomal protein S3                                                     | RPS3        | sp E2RH47 RS3_CANFA    | 27                     | 0.0                       | 4.5               | 6.0              | 0.0                     | 0.7         | 1.5       |
| 40S ribosomal protein S3a                                                    | RPS3A       | tr F2Z4Q5 F2Z4Q5_CANFA | 30                     | 0.0                       | 5.1               | 3.8              | 0.0                     | 2.6         | 0.8       |
| 60 kDa heat shock protein, mitochondrial                                     | HSPD1       | tr E2QUU5 E2QUU5_CANFA | 61                     | 2.8                       | 6.8               | 14.9             | 2.6                     | 0.6         | 6.8       |
| 6-phosphogluconate dehydrogenase, decarboxylating                            | PGD         | tr F1PE09 F1PE09_CANFA | 53                     | 0.0                       | 5.4               | 9.8              | 0.0                     | 1.3         | 2.7       |
| Actin, cytoplasmic 1                                                         | ACTB        | sp O18840 ACTB_CANFA   | 42                     | 68.0                      | 94.4              | 125.7            | 11.3                    | 9.9         | 5.8       |
| Adenosylhomocysteinase                                                       | AHCY        | tr E2QXS7 E2QXS7_CANFA | 48                     | 4.8                       | 4.0               | 8.3              | 1.2                     | 1.3         | 1.3       |
| Adenylyl cyclase-associated protein                                          | CAP1        | tr E2QZ50 E2QZ50_CANFA | 51                     | 5.4                       | 14.2              | 18.3             | 1.1                     | 3.0         | 3.1       |
| Aggrecan core protein                                                        | ACAN        | sp Q28343 PGCA_CANFA   | 241                    | 159.2                     | 28.8              | 24.0             | 83.6                    | 12.1        | 13.4      |
| Alpha-centractin                                                             | ACTR1A      | sp P61162 ACTZ_CANFA   | 43                     | 1.1                       | 1.8               | 5.2              | 1.9                     | 1.6         | 0.7       |
| Annexin                                                                      | ANXA5       | tr E2RQ14 E2RQ14_CANFA | 36                     | 30.2                      | 23.6              | 19.5             | 5.6                     | 3.5         | 1.9       |
| Annexin (Fragment)                                                           | ANXA6       | tr E2RCI8 E2RCI8_CANFA | 76                     | 9.1                       | 19.9              | 33.5             | 4.8                     | 1.2         | 7.5       |
| Apolipoprotein A-I                                                           | APOA1       | tr F1PDJ5 F1PDJ5_CANFA | 30                     | 42.2                      | 69.7              | 53.2             | 3.9                     | 6.6         | 3.2       |
| Apolipoprotein E                                                             | APOE        | tr F1PJ74 F1PJ74_CANFA | 37                     | 0.6                       | 10.3              | 13.1             | 1.0                     | 3.1         | 4.3       |
| ATP synthase subunit alpha                                                   | ATP5A1      | tr E2RNG2 E2RNG2_CANFA | 60                     | 11.8                      | 18.3              | 25.1             | 4.3                     | 2.8         | 6.3       |
| Beta-2-microglobulin                                                         | B2M         | tr E2RN10 E2RN10_CANFA | 14                     | 0.9                       | 1.9               | 4.6              | 0.9                     | 0.8         | 1.5       |
| Calnexin                                                                     | CANX        | sp P24643 CALX_CANFA   | 68                     | 6.0                       | 6.0               | 13.0             | 2.4                     | 1.2         | 1.9       |
| Calreticulin                                                                 | CALR        | tr F6UYJ9 F6UYJ9_CANFA | 47                     | 5.4                       | 12.0              | 19.4             | 2.8                     | 1.1         | 6.7       |
| Catalase                                                                     | CAT         | sp O97492 CATA_CANFA   | 60                     | 0.0                       | 3.0               | 9.6              | 0.0                     | 0.3         | 1.2       |
| Cathepsin D                                                                  | CTSD        | sp Q4LAL9 CATD_CANFA   | 44                     | 0.4                       | 11.0              | 13.2             | 0.6                     | 0.9         | 0.4       |
| Cathepsin K                                                                  | CTSK        | sp Q3ZKN1 CATK_CANFA   | 37                     | 0.0                       | 1.1               | 4.8              | 0.0                     | 1.1         | 2.0       |
| Cathepsin S                                                                  | CTSS        | sp Q8HY81 CATS_CANFA   | 37                     | 0.0                       | 0.7               | 5.0              | 0.0                     | 0.6         | 1.6       |
| Clusterin                                                                    | CLU         | sp P25473 CLUS_CANFA   | 52                     | 27.4                      | 14.3              | 16.4             | 8.2                     | 1.4         | 1.9       |
| Coatomer subunit alpha                                                       | COPA        | tr F1PU93 F1PU93_CANFA | 137                    | 0.4                       | 3.0               | 5.4              | 0.6                     | 1.1         | 1.3       |
| Coatomer subunit gamma                                                       | COPG1       | tr E2RPG9 E2RPG9_CANFA | 98                     | 1.5                       | 5.7               | 5.3              | 1.3                     | 0.8         | 1.5       |
| Collagen alpha-1(I) chain                                                    | COL1A1      | tr F1Q3I5 F1Q3I5_CANFA | 139                    | 39.0                      | 43.7              | 22.9             | 9.1                     | 4.3         | 5.7       |
| Collagen alpha-2(I)                                                          | COL1A2      | tr F1PHY1 F1PHY1_CANFA | 129                    | 43.8                      | 51.8              | 25.5             | 12.9                    | 3.1         | 4.7       |
| Coronin                                                                      | CORO1A      | tr E2QSZ5 E2QSZ5_CANFA | 51                     | 0.0                       | 0.7               | 8.9              | 0.0                     | 0.6         | 2.4       |
| Decorin                                                                      | DCN         | sp Q29393 PGS2_CANFA   | 40                     | 45.4                      | 27.7              | 17.4             | 5.3                     | 3.1         | 5.2       |
| Dipeptidyl peptidase 1 (Fragment)                                            | CTSC        | sp O97578 CATC_CANFA   | 49                     | 0.0                       | 10.4              | 14.3             | 0.0                     | 3.0         | 2.8       |
| Dolichyl-diphosphooligosaccharide-protein glycosyltransferase 48 kDa subunit | DDOST       | sp Q05052 OST48_CANFA  | 50                     | 0.4                       | 4.9               | 6.6              | 0.6                     | 0.6         | 0.8       |
| Endoplasmic reticulum chaperone protein                                      | HSP90B      | sp P41148 ENPL_CANFA   | 93                     | 15.5                      | 26.2              | 43.5             | 5.9                     | 1.7         | 13.6      |
| Enolase                                                                      | ENO1        | tr F1PCH3 F1PCH3_CANFA | 47                     | 69.9                      | 47.6              | 50.7             | 8.4                     | 4.6         | 4.2       |
| Fascin                                                                       | FSCN1       | tr F1PYU3 F1PYU3_CANFA | 55                     | 0.4                       | 7.0               | 9.9              | 0.6                     | 2.2         | 4.9       |
| Ferritin light chain                                                         | FTL         | sp Q53VB8 FRIL_CANFA   | 20                     | 8.8                       | 19.5              | 19.4             | 4.7                     | 3.6         | 4.0       |
| Galectin-1                                                                   | GALS1       | tr E2RJL1 E2RJL1_CANFA | 15                     | 8.7                       | 19.7              | 21.6             | 3.3                     | 1.7         | 6.5       |
| Glucose-6-phosphate 1-dehydrogenase (Fragment)                               | G6PD        | tr E2R0I9 E2R0I9_CANFA | 60                     | 1.1                       | 2.4               | 8.9              | 2.0                     | 1.5         | 2.9       |
| Glucose-6-phosphate isomerase                                                | GPI         | tr E2R2C3 E2R2C3_CANFA | 63                     | 22.3                      | 14.2              | 15.7             | 4.7                     | 1.9         | 2.3       |
| Glutamate dehydrogenase (Fragment)                                           | GLUD1       | tr F1Q2N5 F1Q2N5_CANFA | 54                     | 5.0                       | 7.1               | 14.3             | 3.0                     | 2.2         | 2.2       |
| Guanine nucleotide-binding protein G(i) subunit alpha-2                      | GNAI2       | sp P38400 GNAI2_CANFA  | 41                     | 5.0                       | 9.6               | 16.5             | 1.7                     | 6.0         | 2.6       |

| Protein Name                                                    | Gene Symbol | Accession Number       | Molecular Weight (kDa) | Total Spectrum Count_Mean |                   |                  | Total Spectrum Count_SD |             |           |
|-----------------------------------------------------------------|-------------|------------------------|------------------------|---------------------------|-------------------|------------------|-------------------------|-------------|-----------|
|                                                                 |             |                        |                        | Normal (N=3)              | Repair-only (N=3) | ASC+BMP 12 (N=3) | Normal                  | Repair-only | ASC+BMP12 |
| Guanine nucleotide-binding protein G(s) subunit alpha           | GNAS        | sp P63091 GNAS_CANFA   | 46                     | 5.0                       | 0.3               | 0.9              | 2.8                     | 0.6         | 1.5       |
| Haptoglobin                                                     | HP          | sp P19006 HPT_CANFA    | 36                     | 16.2                      | 28.1              | 15.1             | 2.4                     | 2.4         | 2.1       |
| Heat shock 70 kDa protein 1                                     | HSPA1       | sp Q7YQC6 HSP71_CANFA  | 70                     | 29.7                      | 12.0              | 13.2             | 4.9                     | 1.1         | 1.9       |
| Histone H3                                                      | LOC488263   | tr J9PB22 J9PB22_CANFA | 15                     | 0.4                       | 1.3               | 4.6              | 0.6                     | 2.3         | 0.7       |
| Histone H4                                                      | LOC486670   | tr F2Z4N2 F2Z4N2_CANFA | 11                     | 5.0                       | 11.7              | 10.0             | 2.8                     | 3.1         | 0.7       |
| Integrin beta                                                   | ITGB2       | tr F1Q1H6 F1Q1H6_CANFA | 85                     | 0.4                       | 1.0               | 9.0              | 0.6                     | 1.0         | 1.0       |
| Isocitrate dehydrogenase [NADP]                                 | IDH2        | tr F1PAM3 F1PAM3_CANFA | 47                     | 0.0                       | 1.8               | 9.4              | 0.0                     | 0.4         | 3.3       |
| Lysozyme C, spleen isozyme                                      | N/A         | sp P81709 LYSC2_CANFA  | 15                     | 1.8                       | 7.3               | 11.1             | 1.7                     | 2.1         | 3.9       |
| Matrix metalloproteinase-9                                      | MMP9        | tr F1PYF5 F1PYF5_CANFA | 78                     | 0.0                       | 0.4               | 6.3              | 0.0                     | 0.6         | 1.7       |
| MHC class II DR alpha chain                                     | DLA DRA     | tr Q30437 Q30437_CANFA | 29                     | 0.0                       | 5.3               | 18.0             | 0.0                     | 3.6         | 2.1       |
| Myocilin                                                        | MYOC        | sp Q2PT31 MYOC_CANFA   | 54                     | 94.0                      | 0.9               | 0.0              | 28.8                    | 1.5         | 0.0       |
| Myosin-9                                                        | MYH9        | sp Q258K2 MYH9_CANFA   | 226                    | 4.0                       | 32.5              | 58.1             | 4.5                     | 11.1        | 15.7      |
| Neutrophil elastase                                             | ELA2        | tr Q8MJD1 Q8MJD1_CANFA | 30                     | 0.0                       | 0.7               | 5.3              | 0.0                     | 0.6         | 1.9       |
| Peptidyl-prolyl cis-trans isomerase                             | PPIB        | tr F1PLV2 F1PLV2_CANFA | 24                     | 7.2                       | 13.0              | 11.3             | 1.9                     | 1.6         | 0.5       |
| Phosphatidylethanolamine-binding protein 1                      | PEBP1       | sp Q3YIX4 PEBP1_CANFA  | 21                     | 16.9                      | 12.0              | 6.9              | 2.3                     | 1.6         | 1.3       |
| Proteasome subunit beta type                                    | PSMB5       | tr E2R3R2 E2R3R2_CANFA | 29                     | 4.6                       | 1.6               | 1.4              | 1.2                     | 1.4         | 1.0       |
| Protein kinase C (Fragment)                                     | PRKCA       | tr F1Q1D5 F1Q1D5_CANFA | 71                     | 4.7                       | 0.8               | 0.2              | 2.3                     | 0.7         | 0.4       |
| Ras-related protein Rab-10                                      | RAB10       | sp P24409 RAB10_CANFA  | 23                     | 0.0                       | 1.0               | 4.8              | 0.0                     | 1.8         | 0.3       |
| Ras-related protein Rab-1A                                      | RAB1A       | sp P62822 RAB1A_CANFA  | 23                     | 3.7                       | 10.6              | 10.9             | 3.8                     | 0.1         | 0.7       |
| Ras-related protein Rab-7a                                      | RAB7A       | sp P18067 RAB7A_CANFA  | 24                     | 3.9                       | 8.8               | 7.2              | 2.0                     | 1.7         | 1.2       |
| Ras-related protein Rab-8A                                      | RAB8A       | sp P61007 RAB8A_CANFA  | 24                     | 0.0                       | 0.0               | 5.0              | 0.0                     | 0.0         | 1.5       |
| Ribosome-binding protein 1                                      | RRBP1       | sp Q28298 RRBP1_CANFA  | 165                    | 0.0                       | 13.1              | 12.7             | 0.0                     | 0.9         | 3.6       |
| S100 calcium binding protein A8                                 | S100A8      | tr COLQL0 COLQL0_CANFA | 10                     | 1.3                       | 8.8               | 18.4             | 0.4                     | 3.2         | 4.9       |
| Scavenger receptor cysteine-rich type 1 protein M130            | CD163       | sp Q2VLG6 C163A_CANFA  | 122                    | 0.0                       | 2.1               | 12.1             | 0.0                     | 1.8         | 1.4       |
| Serine/threonine-protein phosphatase PP1-beta catalytic subunit | PPP1CB      | sp Q8MJ47 PP1B_CANFA   | 37                     | 2.8                       | 4.8               | 7.9              | 2.1                     | 0.7         | 2.5       |
| Serum albumin                                                   | ALB         | sp P49822 ALBU_CANFA   | 69                     | 118.3                     | 290.4             | 216.0            | 102.7                   | 34.1        | 9.1       |
| Superoxide dismutase [Cu-Zn]                                    | SOD3        | tr F1PAS8 F1PAS8_CANFA | 33                     | 27.4                      | 6.0               | 2.6              | 3.9                     | 2.2         | 1.5       |
| T-complex protein 1 subunit                                     | TCP1        | tr E2R0L9 E2R0L9_CANFA | 60                     | 2.0                       | 3.6               | 8.1              | 0.3                     | 3.4         | 2.0       |
| Thioredoxin (Fragment)                                          | TXN         | tr J9NWJ5 J9NWJ5_CANFA | 11                     | 8.2                       | 10.2              | 14.1             | 3.3                     | 1.6         | 1.3       |
| Transforming protein RhoA                                       | RHOA        | tr F6XY66 F6XY66_CANFA | 22                     | 1.5                       | 3.7               | 6.5              | 1.7                     | 1.4         | 1.1       |
| UDP-glucose 6-dehydrogenase                                     | UGDH        | tr E2R311 E2R311_CANFA | 55                     | 3.1                       | 12.1              | 10.7             | 2.0                     | 0.4         | 1.7       |
| Uncharacterized protein                                         | n/a         | tr J9NVC6 J9NVC6_CANFA | 68                     | 5.0                       | 26.3              | 16.3             | 4.5                     | 3.7         | 0.3       |
| Uncharacterized protein                                         | n/a         | tr J9P9J6 J9P9J6_CANFA | 37                     | 0.4                       | 13.3              | 3.8              | 0.6                     | 2.4         | 2.1       |
| Uncharacterized protein                                         | n/a         | tr F2Z4P1 F2Z4P1_CANFA | 50                     | 0.0                       | 6.7               | 24.8             | 0.0                     | 11.6        | 3.2       |
| Uncharacterized protein                                         | WARS        | tr E2RGG9 E2RGG9_CANFA | 54                     | 0.0                       | 2.7               | 8.7              | 0.0                     | 1.1         | 1.3       |
| Uncharacterized protein                                         | VIT         | tr E2QY57 E2QY57_CANFA | 76                     | 7.1                       | 0.0               | 0.2              | 4.3                     | 0.0         | 0.4       |
| Uncharacterized protein                                         | VIM         | tr F1PLS4 F1PLS4_CANFA | 54                     | 343.5                     | 172.6             | 123.0            | 114.1                   | 14.2        | 15.5      |
| Uncharacterized protein                                         | VDAC3       | tr J9PAN9 J9PAN9_CANFA | 31                     | 0.0                       | 1.6               | 5.0              | 0.0                     | 1.4         | 0.7       |
| Uncharacterized protein                                         | UPP1        | tr H9GWE2 H9GWE2_CANFA | 34                     | 0.0                       | 5.6               | 7.3              | 0.0                     | 0.5         | 2.1       |
| Uncharacterized protein                                         | TXNDC5      | tr F1PHP1 F1PHP1_CANFA | 36                     | 1.8                       | 8.2               | 8.2              | 1.7                     | 1.4         | 1.9       |
| Uncharacterized protein                                         | TUBB6       | tr E2QYC2 E2QYC2_CANFA | 50                     | 0.0                       | 18.2              | 19.2             | 0.0                     | 1.7         | 2.1       |

| Protein Name            | Gene Symbol | Accession Number       | Molecular Weight (kDa) | Total Spectrum Count_Mean |                   |                 | Total Spectrum Count_SD |             |           |
|-------------------------|-------------|------------------------|------------------------|---------------------------|-------------------|-----------------|-------------------------|-------------|-----------|
|                         |             |                        |                        | Normal (N=3)              | Repair-only (N=3) | ASC+BMP12 (N=3) | Normal                  | Repair-only | ASC+BMP12 |
| Uncharacterized protein | TNXB        | tr J9PBD8 J9PBD8_CANFA | 445                    | 182.2                     | 61.8              | 9.7             | 20.1                    | 27.6        | 4.9       |
| Uncharacterized protein | TNN         | tr J9P416 J9P416_CANFA | 149                    | 0.0                       | 13.8              | 2.9             | 0.0                     | 6.7         | 0.9       |
| Uncharacterized protein | TKT         | tr F1PE28 F1PE28_CANFA | 63                     | 16.7                      | 19.4              | 28.0            | 3.7                     | 1.9         | 3.4       |
| Uncharacterized protein | THBS4       | tr F1PSS2 F1PSS2_CANFA | 96                     | 62.5                      | 25.1              | 8.6             | 32.1                    | 4.4         | 2.1       |
| Uncharacterized protein | TF          | tr J9P430 J9P430_CANFA | 83                     | 99.6                      | 119.5             | 87.5            | 11.7                    | 9.2         | 6.0       |
| Uncharacterized protein | n/a         | tr J9P3C5 J9P3C5_CANFA | 17                     | 0.6                       | 2.6               | 4.5             | 1.0                     | 0.5         | 0.6       |
| Uncharacterized protein | WNT10B      | tr E2RSF6 E2RSF6_CANFA | 21                     | 5.4                       | 7.2               | 11.4            | 2.8                     | 0.9         | 2.0       |
| Uncharacterized protein | VCL         | tr J9P4F3 J9P4F3_CANFA | 117                    | 8.9                       | 15.9              | 14.3            | 2.0                     | 1.2         | 3.6       |
| Uncharacterized protein | VCAN        | tr J9P884 J9P884_CANFA | 261                    | 48.9                      | 16.3              | 8.9             | 3.7                     | 1.4         | 5.3       |
| Uncharacterized protein | UQCRC2      | tr E2RHL0 E2RHL0_CANFA | 41                     | 0.0                       | 3.2               | 5.5             | 0.0                     | 2.2         | 2.4       |
| Uncharacterized protein | UQCRC1      | tr E2RSI5 E2RSI5_CANFA | 54                     | 0.0                       | 1.1               | 6.3             | 0.0                     | 0.2         | 2.9       |
| Uncharacterized protein | TPM4        | tr E2R662 E2R662_CANFA | 29                     | 2.6                       | 18.0              | 20.4            | 2.3                     | 2.0         | 3.7       |
| Uncharacterized protein | TPM1        | tr E2RB38 E2RB38_CANFA | 29                     | 2.2                       | 16.7              | 21.6            | 2.2                     | 2.9         | 3.5       |
| Uncharacterized protein | TPM1        | tr F1P912 F1P912_CANFA | 37                     | 0.0                       | 12.2              | 16.7            | 0.0                     | 2.5         | 1.8       |
| Uncharacterized protein | TNXB        | tr F1Q432 F1Q432_CANFA | 419                    | 186.2                     | 62.3              | 5.4             | 20.7                    | 27.4        | 5.2       |
| Uncharacterized protein | TNC         | tr J9NRP5 J9NRP5_CANFA | 260                    | 114.6                     | 133.7             | 67.6            | 19.2                    | 7.4         | 15.0      |
| Uncharacterized protein | TLN1        | tr F1PSC2 F1PSC2_CANFA | 270                    | 17.8                      | 25.9              | 41.2            | 1.8                     | 2.3         | 4.8       |
| Uncharacterized protein | THBS1       | tr F1PBI6 F1PBI6_CANFA | 130                    | 32.0                      | 1.6               | 0.7             | 9.3                     | 0.9         | 0.7       |
| Uncharacterized protein | TGM2        | tr F1Q435 F1Q435_CANFA | 77                     | 0.0                       | 0.0               | 10.4            | 0.0                     | 0.0         | 4.2       |
| Uncharacterized protein | SYNCRIP     | tr F6XIK8 F6XIK8_CANFA | 63                     | 0.4                       | 5.0               | 6.0             | 0.6                     | 1.8         | 1.9       |
| Uncharacterized protein | STAT1       | tr E2RI99 E2RI99_CANFA | 87                     | 0.0                       | 0.0               | 6.9             | 0.0                     | 0.0         | 2.5       |
| Uncharacterized protein | SSR4        | tr E2QY54 E2QY54_CANFA | 19                     | 1.1                       | 4.7               | 6.2             | 1.1                     | 1.9         | 1.2       |
| Uncharacterized protein | SND1        | tr E2RH91 E2RH91_CANFA | 102                    | 0.0                       | 5.5               | 12.0            | 0.0                     | 2.4         | 3.6       |
| Uncharacterized protein | SMPDL3A     | tr J9NYQ3 J9NYQ3_CANFA | 52                     | 0.0                       | 7.7               | 6.6             | 0.0                     | 2.1         | 1.3       |
| Uncharacterized protein | SLC29A1     | tr E2RLS3 E2RLS3_CANFA | 83                     | 14.5                      | 16.6              | 28.5            | 0.9                     | 0.4         | 5.9       |
| Uncharacterized protein | SFPQ        | tr F1P7J0 F1P7J0_CANFA | 71                     | 0.9                       | 3.5               | 5.0             | 0.9                     | 1.7         | 1.6       |
| Uncharacterized protein | SERPINH1    | tr E2RHY7 E2RHY7_CANFA | 47                     | 5.4                       | 28.5              | 19.5            | 2.2                     | 3.3         | 0.2       |
| Uncharacterized protein | SERPINF1    | tr F2Z4Q7 F2Z4Q7_CANFA | 47                     | 24.2                      | 21.1              | 11.4            | 4.9                     | 2.9         | 0.9       |
| Uncharacterized protein | SERPINB1    | tr E2RKJ6 E2RKJ6_CANFA | 43                     | 0.0                       | 2.1               | 11.0            | 0.0                     | 2.1         | 0.8       |
| Uncharacterized protein | SEPT7       | tr F1Q067 F1Q067_CANFA | 45                     | 3.7                       | 4.6               | 7.2             | 0.6                     | 1.2         | 1.7       |
| Uncharacterized protein | RPN2        | tr F1PCT7 F1PCT7_CANFA | 71                     | 0.7                       | 6.5               | 11.6            | 0.6                     | 1.4         | 0.7       |
| Uncharacterized protein | RPN1        | tr E2RQ08 E2RQ08_CANFA | 69                     | 2.0                       | 8.9               | 14.2            | 1.1                     | 3.4         | 1.8       |
| Uncharacterized protein | RPLP0       | tr F1PUX4 F1PUX4_CANFA | 34                     | 0.4                       | 3.3               | 5.3             | 0.6                     | 0.8         | 2.4       |
| Uncharacterized protein | RDX         | tr E2RRC6 E2RRC6_CANFA | 71                     | 7.3                       | 0.0               | 11.2            | 7.2                     | 0.0         | 0.4       |
| Uncharacterized protein | RCN3        | tr E2R5D5 E2R5D5_CANFA | 38                     | 0.4                       | 9.2               | 8.9             | 0.6                     | 2.4         | 2.4       |
| Uncharacterized protein | RBBP4       | tr E2QXR8 E2QXR8_CANFA | 48                     | 0.4                       | 3.4               | 4.5             | 0.6                     | 1.2         | 0.6       |
| Uncharacterized protein | PTPRC       | tr F1Q1S4 F1Q1S4_CANFA | 148                    | 0.0                       | 0.0               | 7.2             | 0.0                     | 0.0         | 0.6       |
| Uncharacterized protein | PTGR1       | tr E2R002 E2R002_CANFA | 36                     | 0.9                       | 6.9               | 10.4            | 0.9                     | 1.0         | 3.2       |
| Uncharacterized protein | PRG4        | tr F1PXD6 F1PXD6_CANFA | 94                     | 11.9                      | 12.2              | 4.2             | 1.6                     | 5.7         | 0.8       |
| Uncharacterized protein | PRELP       | tr E2RL80 E2RL80_CANFA | 43                     | 111.5                     | 73.0              | 53.2            | 21.2                    | 3.6         | 12.2      |
| Uncharacterized protein | PRDX3       | tr E2RRD4 E2RRD4_CANFA | 28                     | 1.1                       | 3.7               | 6.3             | 2.0                     | 0.9         | 1.1       |
| Uncharacterized protein | POSTN       | tr E2QYG1 E2QYG1_CANFA | 87                     | 0.0                       | 34.6              | 17.6            | 0.0                     | 7.2         | 0.9       |
| Uncharacterized protein | PLS3        | tr F6V234 F6V234_CANFA | 71                     | 23.0                      | 14.9              | 8.8             | 2.9                     | 3.5         | 1.5       |
| Uncharacterized protein | PDIA6       | tr E2RB37 E2RB37_CANFA | 48                     | 4.4                       | 18.3              | 14.7            | 4.0                     | 2.7         | 2.6       |
| Uncharacterized protein | PDIA4       | tr E2R7L1 E2R7L1_CANFA | 72                     | 3.3                       | 10.8              | 20.5            | 0.1                     | 3.3         | 6.9       |
| Uncharacterized protein | PDIA3       | tr E2RD86 E2RD86_CANFA | 57                     | 19.8                      | 35.0              | 35.4            | 3.8                     | 2.4         | 3.6       |
| Uncharacterized protein | PCOLCE      | tr E2RC23 E2RC23_CANFA | 49                     | 20.2                      | 12.9              | 5.4             | 6.2                     | 3.9         | 3.0       |

| Protein Name            | Gene Symbol  | Accession Number       | Molecular Weight (kDa) | Total Spectrum Count_Mean |                   |                 | Total Spectrum Count_SD |             |           |
|-------------------------|--------------|------------------------|------------------------|---------------------------|-------------------|-----------------|-------------------------|-------------|-----------|
|                         |              |                        |                        | Normal (N=3)              | Repair-only (N=3) | ASC+BMP12 (N=3) | Normal                  | Repair-only | ASC+BMP12 |
| Uncharacterized protein | PADI4        | tr E2QVS7 E2QVS7_CANFA | 74                     | 0.0                       | 0.0               | 5.0             | 0.0                     | 0.0         | 3.3       |
| Uncharacterized protein | PARPC1       | tr J9P326 J9P326_CANFA | 71                     | 0.0                       | 1.7               | 5.9             | 0.0                     | 2.1         | 1.6       |
| Uncharacterized protein | P4HB         | tr F1PL97 F1PL97_CANFA | 57                     | 13.5                      | 31.8              | 30.5            | 5.0                     | 6.2         | 6.4       |
| Uncharacterized protein | OGN          | tr E2RNR0 E2RNR0_CANFA | 41                     | 45.0                      | 28.3              | 21.5            | 8.0                     | 0.2         | 5.7       |
| Uncharacterized protein | NID2         | tr F1P7Y6 F1P7Y6_CANFA | 84                     | 18.5                      | 9.1               | 6.8             | 6.3                     | 0.6         | 0.8       |
| Uncharacterized protein | MZB1         | tr E2R464 E2R464_CANFA | 21                     | 0.0                       | 0.0               | 4.1             | 0.0                     | 0.0         | 1.0       |
| Uncharacterized protein | MVP          | tr F1P914 F1P914_CANFA | 99                     | 0.7                       | 3.4               | 7.6             | 1.3                     | 1.2         | 3.0       |
| Uncharacterized protein | MSN          | tr E2R7F1 E2R7F1_CANFA | 68                     | 13.4                      | 20.5              | 27.3            | 0.3                     | 2.7         | 3.6       |
| Uncharacterized protein | MMP2         | tr J9P206 J9P206_CANFA | 66                     | 0.0                       | 10.9              | 3.6             | 0.0                     | 3.7         | 2.8       |
| Uncharacterized protein | MATN2        | tr F1PGH3 F1PGH3_CANFA | 103                    | 8.1                       | 3.2               | 0.2             | 4.3                     | 1.7         | 0.4       |
| Uncharacterized protein | LUM          | tr E2R416 E2R416_CANFA | 38                     | 84.0                      | 67.8              | 36.6            | 18.5                    | 13.6        | 6.8       |
| Uncharacterized protein | LTF          | tr F1PR54 F1PR54_CANFA | 77                     | 1.1                       | 6.9               | 40.5            | 2.0                     | 4.5         | 10.7      |
| Uncharacterized protein | LOC611458    | tr J9PBN6 J9PBN6_CANFA | 166                    | 0.4                       | 36.3              | 14.7            | 0.6                     | 8.1         | 5.7       |
| Uncharacterized protein | LOC608476    | tr E2R974 E2R974_CANFA | 15                     | 7.5                       | 4.8               | 0.9             | 2.9                     | 0.7         | 0.8       |
| Uncharacterized protein | LOC478252    | tr E2RHH8 E2RHH8_CANFA | 19                     | 2.4                       | 4.6               | 7.6             | 2.3                     | 1.2         | 1.9       |
| Uncharacterized protein | LOC100855471 | tr J9P889 J9P889_CANFA | 94                     | 144.0                     | 81.0              | 44.5            | 14.5                    | 8.4         | 16.8      |
| Uncharacterized protein | LMAN1        | tr E2QW60 E2QW60_CANFA | 58                     | 0.7                       | 4.5               | 6.8             | 0.6                     | 0.7         | 1.6       |
| Uncharacterized protein | LCP1         | tr E2QWN7 E2QWN7_CANFA | 70                     | 4.8                       | 21.7              | 31.7            | 1.2                     | 1.5         | 6.3       |
| Uncharacterized protein | LAP3         | tr E2RLY5 E2RLY5_CANFA | 56                     | 1.7                       | 9.9               | 16.7            | 3.0                     | 1.2         | 5.8       |
| Uncharacterized protein | LAMC1        | tr F1PHK9 F1PHK9_CANFA | 165                    | 19.4                      | 8.3               | 9.6             | 5.3                     | 3.7         | 3.9       |
| Uncharacterized protein | LAMB2        | tr E2R4J1 E2R4J1_CANFA | 196                    | 23.3                      | 3.3               | 4.1             | 9.2                     | 0.8         | 3.7       |
| Uncharacterized protein | KRT5         | tr E2R8Z5 E2R8Z5_CANFA | 63                     | 15.4                      | 7.5               | 6.9             | 3.0                     | 1.8         | 1.9       |
| Uncharacterized protein | KERA         | tr E2R423 E2R423_CANFA | 40                     | 27.2                      | 13.7              | 6.6             | 6.4                     | 3.6         | 5.8       |
| Uncharacterized protein | KCTD12       | tr E2RJY0 E2RJY0_CANFA | 36                     | 1.1                       | 6.8               | 5.4             | 2.0                     | 0.6         | 0.4       |
| Uncharacterized protein | ITIH2        | tr F1PG39 F1PG39_CANFA | 107                    | 3.0                       | 12.9              | 11.2            | 1.7                     | 3.7         | 2.2       |
| Uncharacterized protein | IGKC         | tr F1PNY2 F1PNY2_CANFA | 26                     | 6.8                       | 15.7              | 13.8            | 1.9                     | 2.7         | 4.3       |
| Uncharacterized protein | HYOU1        | tr E2RB31 E2RB31_CANFA | 111                    | 0.7                       | 2.6               | 11.5            | 0.6                     | 0.5         | 3.0       |
| Uncharacterized protein | HTRA1        | tr J9P2L4 J9P2L4_CANFA | 43                     | 1.5                       | 7.5               | 2.8             | 1.7                     | 0.8         | 1.2       |
| Uncharacterized protein | HSPA8        | tr E2ROT6 E2ROT6_CANFA | 71                     | 15.5                      | 32.3              | 27.7            | 7.5                     | 3.3         | 2.3       |
| Uncharacterized protein | HSPA5        | tr F1PIC7 F1PIC7_CANFA | 72                     | 18.0                      | 32.4              | 36.6            | 9.8                     | 0.9         | 6.1       |
| Uncharacterized protein | HPX          | tr F1PZR4 F1PZR4_CANFA | 51                     | 17.5                      | 27.9              | 14.1            | 5.6                     | 0.7         | 2.9       |
| Uncharacterized protein | HNRNPL       | tr E2R944 E2R944_CANFA | 64                     | 4.6                       | 8.8               | 7.8             | 0.4                     | 2.2         | 1.7       |
| Uncharacterized protein | HNRNPH2      | tr E2RJH5 E2RJH5_CANFA | 49                     | 0.0                       | 5.8               | 3.6             | 0.0                     | 2.0         | 3.1       |
| Uncharacterized protein | HNRNPF       | tr E2RB90 E2RB90_CANFA | 46                     | 0.0                       | 3.6               | 5.3             | 0.0                     | 2.7         | 2.2       |
| Uncharacterized protein | HNRNPD       | tr E2RIX2 E2RIX2_CANFA | 38                     | 3.7                       | 5.4               | 8.6             | 0.6                     | 1.3         | 1.8       |
| Uncharacterized protein | HRNPA3       | tr E2RFV7 E2RFV7_CANFA | 40                     | 6.7                       | 12.2              | 12.1            | 2.2                     | 1.1         | 3.3       |
| Uncharacterized protein | HLA-DQA1     | tr J9P739 J9P739_CANFA | 28                     | 0.0                       | 0.0               | 4.2             | 0.0                     | 0.0         | 1.4       |
| Uncharacterized protein | HDLBP        | tr E2RET1 E2RET1_CANFA | 142                    | 0.0                       | 8.9               | 6.5             | 0.0                     | 1.9         | 1.7       |
| Uncharacterized protein | HAPLN3       | tr E2R1I9 E2R1I9_CANFA | 41                     | 11.0                      | 0.7               | 0.0             | 2.8                     | 1.2         | 0.0       |
| Uncharacterized protein | HAPLN1       | tr J9PAT9 J9PAT9_CANFA | 40                     | 45.8                      | 12.7              | 11.5            | 13.4                    | 6.5         | 4.6       |
| Uncharacterized protein | GSTM4        | tr F1P6R7 F1P6R7_CANFA | 26                     | 13.7                      | 2.6               | 2.9             | 3.2                     | 0.5         | 1.4       |
| Uncharacterized protein | GSTM3        | tr E2R5B9 E2R5B9_CANFA | 27                     | 9.1                       | 1.8               | 1.7             | 4.2                     | 1.6         | 0.6       |
| Uncharacterized protein | GNB2L1       | tr F1PLR0 F1PLR0_CANFA | 35                     | 6.6                       | 14.8              | 17.3            | 3.2                     | 3.7         | 1.3       |
| Uncharacterized protein | GNAI3        | tr F1P6Q0 F1P6Q0_CANFA | 41                     | 0.0                       | 1.1               | 7.2             | 0.0                     | 1.8         | 2.3       |
| Uncharacterized protein | GC           | tr F1P841 F1P841_CANFA | 54                     | 25.7                      | 36.7              | 27.1            | 4.5                     | 4.0         | 0.8       |
| Uncharacterized protein | GANAB        | tr E2R729 E2R729_CANFA | 109                    | 1.9                       | 5.3               | 9.4             | 1.3                     | 2.1         | 3.2       |
| Uncharacterized protein | FLNB         | tr E2R0F2 E2R0F2_CANFA | 281                    | 0.4                       | 0.0               | 5.9             | 0.6                     | 0.0         | 1.8       |

| Protein Name            | Gene Symbol | Accession Number       | Molecular Weight (kDa) | Total Spectrum Count_Mean |                   |                 | Total Spectrum Count_SD |             |           |
|-------------------------|-------------|------------------------|------------------------|---------------------------|-------------------|-----------------|-------------------------|-------------|-----------|
|                         |             |                        |                        | Normal (N=3)              | Repair-only (N=3) | ASC+BMP12 (N=3) | Normal                  | Repair-only | ASC+BMP12 |
| Uncharacterized protein | FLNA        | tr F1PWW0 F1PWW0_CANFA | 281                    | 7.6                       | 49.2              | 60.1            | 2.4                     | 2.7         | 7.5       |
| Uncharacterized protein | FKBP10      | tr E2QZA8 E2QZA8_CANFA | 64                     | 0.7                       | 10.4              | 7.2             | 1.3                     | 2.2         | 0.7       |
| Uncharacterized protein | FBP1        | tr E2RAN6 E2RAN6_CANFA | 37                     | 0.0                       | 0.0               | 23.4            | 0.0                     | 0.0         | 11.0      |
| Uncharacterized protein | FBLN5       | tr F1PJM1 F1PJM1_CANFA | 51                     | 9.5                       | 3.7               | 3.3             | 2.4                     | 0.9         | 1.6       |
| Uncharacterized protein | FBLN1       | tr F1PLV6 F1PLV6_CANFA | 78                     | 50.9                      | 25.1              | 12.6            | 7.1                     | 4.4         | 3.1       |
| Uncharacterized protein | F13A1       | tr F1PKX3 F1PKX3_CANFA | 83                     | 28.6                      | 9.3               | 11.2            | 8.4                     | 1.3         | 1.1       |
| Uncharacterized protein | ERO1L       | tr E2RNW5 E2RNW5_CANFA | 54                     | 0.0                       | 0.7               | 7.8             | 0.0                     | 0.6         | 2.4       |
| Uncharacterized protein | EIF4A1      | tr F1P895 F1P895_CANFA | 46                     | 2.6                       | 9.1               | 9.4             | 2.8                     | 0.5         | 2.2       |
| Uncharacterized protein | EHD2        | tr F1PNP7 F1PNP7_CANFA | 61                     | 18.7                      | 9.7               | 7.3             | 0.1                     | 1.8         | 0.6       |
| Uncharacterized protein | EFEMP1      | tr E2R612 E2R612_CANFA | 55                     | 8.7                       | 6.4               | 2.7             | 1.1                     | 1.0         | 1.3       |
| Uncharacterized protein | EEF2        | tr F6XRY2 F6XRY2_CANFA | 95                     | 10.9                      | 31.3              | 35.3            | 2.3                     | 4.3         | 4.0       |
| Uncharacterized protein | EEF1G       | tr E2R574 E2R574_CANFA | 50                     | 2.2                       | 6.4               | 7.8             | 1.2                     | 1.0         | 2.3       |
| Uncharacterized protein | DSTN        | tr J9P1J5 J9P1J5_CANFA | 20                     | 8.7                       | 5.6               | 2.8             | 1.1                     | 0.5         | 1.6       |
| Uncharacterized protein | DPYSL3      | tr F1Q3Y2 F1Q3Y2_CANFA | 62                     | 9.4                       | 24.2              | 11.5            | 1.3                     | 1.1         | 3.6       |
| Uncharacterized protein | dla88       | tr F1PE32 F1PE32_CANFA | 43                     | 0.0                       | 0.0               | 8.3             | 0.0                     | 0.0         | 3.1       |
| Uncharacterized protein | CTSB        | tr E2R6Q7 E2R6Q7_CANFA | 38                     | 1.7                       | 10.5              | 9.1             | 1.7                     | 1.1         | 3.2       |
| Uncharacterized protein | CSPG4       | tr J9P6X3 J9P6X3_CANFA | 248                    | 7.5                       | 0.3               | 0.2             | 5.3                     | 0.6         | 0.4       |
| Uncharacterized protein | CRYAB       | tr E2RNB6 E2RNB6_CANFA | 20                     | 10.3                      | 0.7               | 1.5             | 4.6                     | 0.6         | 2.5       |
| Uncharacterized protein | CP          | tr F1PAX2 F1PAX2_CANFA | 123                    | 16.7                      | 24.9              | 19.3            | 3.7                     | 0.8         | 2.7       |
| Uncharacterized protein | COPE        | tr E2RAT6 E2RAT6_CANFA | 35                     | 0.9                       | 2.5               | 5.3             | 0.9                     | 1.0         | 0.8       |
| Uncharacterized protein | COPE        | tr E2R667 E2R667_CANFA | 102                    | 0.7                       | 2.5               | 5.1             | 1.3                     | 1.5         | 1.9       |
| Uncharacterized protein | COMP        | tr E2RJE0 E2RJE0_CANFA | 87                     | 314.4                     | 40.5              | 18.2            | 145.3                   | 5.6         | 5.1       |
| Uncharacterized protein | COL6A3      | tr F1PR31 F1PR31_CANFA | 342                    | 604.9                     | 361.9             | 234.9           | 35.5                    | 25.2        | 82.8      |
| Uncharacterized protein | COL6A3      | tr F1PR39 F1PR39_CANFA | 323                    | 580.6                     | 344.4             | 221.9           | 32.6                    | 19.6        | 81.2      |
| Uncharacterized protein | COL6A1      | tr F1PFM6 F1PFM6_CANFA | 109                    | 296.1                     | 177.3             | 91.8            | 50.4                    | 26.5        | 32.7      |
| Uncharacterized protein | COL3A1      | tr F1PG69 F1PG69_CANFA | 139                    | 2.0                       | 8.5               | 5.3             | 1.1                     | 1.9         | 2.1       |
| Uncharacterized protein | COL14A1     | tr E2RT85 E2RT85_CANFA | 192                    | 0.0                       | 50.9              | 18.0            | 0.0                     | 13.4        | 2.2       |
| Uncharacterized protein | COL12A1     | tr F6XWS5 F6XWS5_CANFA | 332                    | 105.6                     | 118.1             | 48.4            | 23.1                    | 14.2        | 10.8      |
| Uncharacterized protein | CLTC        | tr F1PHQ0 F1PHQ0_CANFA | 192                    | 9.6                       | 23.5              | 35.2            | 6.0                     | 5.9         | 2.4       |
| Uncharacterized protein | CKAP4       | tr F1PEI2 F1PEI2_CANFA | 65                     | 0.7                       | 18.4              | 15.2            | 1.3                     | 3.8         | 5.8       |
| Uncharacterized protein | CILP2       | tr E2RCP2 E2RCP2_CANFA | 126                    | 60.2                      | 33.4              | 25.0            | 11.7                    | 8.3         | 16.9      |
| Uncharacterized protein | CILP2       | tr E2QSQ9 E2QSQ9_CANFA | 132                    | 35.6                      | 11.3              | 8.3             | 10.0                    | 1.2         | 5.7       |
| Uncharacterized protein | CHAD        | tr E2QRS3 E2QRS3_CANFA | 41                     | 8.7                       | 0.3               | 0.0             | 4.9                     | 0.6         | 0.0       |
| Uncharacterized protein | CD5L        | tr F1PAX5 F1PAX5_CANFA | 38                     | 0.0                       | 8.4               | 4.2             | 0.0                     | 1.0         | 1.5       |
| Uncharacterized protein | CD177       | tr E2RFK4 E2RFK4_CANFA | 42                     | 0.0                       | 0.4               | 5.0             | 0.0                     | 0.6         | 1.6       |
| Uncharacterized protein | CD109       | tr F1PM26 F1PM26_CANFA | 162                    | 14.3                      | 3.8               | 1.9             | 2.9                     | 1.6         | 1.9       |
| Uncharacterized protein | CCT5        | tr J9PAI4 J9PAI4_CANFA | 59                     | 1.3                       | 3.1               | 5.2             | 1.2                     | 1.0         | 1.1       |
| Uncharacterized protein | CAPZB       | tr F1PQS3 F1PQS3_CANFA | 41                     | 1.7                       | 4.9               | 6.8             | 0.5                     | 0.6         | 1.4       |
| Uncharacterized protein | CAPG        | tr E2R413 E2R413_CANFA | 39                     | 4.4                       | 11.5              | 12.7            | 4.4                     | 2.1         | 1.8       |
| Uncharacterized protein | CALU        | tr E2RN38 E2RN38_CANFA | 37                     | 5.4                       | 9.9               | 10.7            | 2.8                     | 0.7         | 1.3       |
| Uncharacterized protein | C7          | tr E2RG01 E2RG01_CANFA | 95                     | 0.4                       | 5.9               | 5.6             | 0.6                     | 1.7         | 1.1       |
| Uncharacterized protein | C5          | tr F1P7J4 F1P7J4_CANFA | 189                    | 3.2                       | 12.4              | 10.2            | 2.8                     | 1.2         | 4.0       |
| Uncharacterized protein | C4BPA       | tr F1PGM9 F1PGM9_CANFA | 58                     | 3.7                       | 16.5              | 10.2            | 2.9                     | 3.1         | 2.0       |
| Uncharacterized protein | C2          | tr E2RS80 E2RS80_CANFA | 141                    | 18.7                      | 25.2              | 12.1            | 2.1                     | 1.7         | 4.3       |
| Uncharacterized protein | C1S         | tr F1P6E1 F1P6E1_CANFA | 78                     | 0.4                       | 6.7               | 2.2             | 0.6                     | 1.1         | 0.3       |
| Uncharacterized protein | BLVRB       | tr E2QVU9 E2QVU9_CANFA | 22                     | 3.0                       | 10.6              | 12.4            | 0.7                     | 4.0         | 0.7       |
| Uncharacterized protein | ATP6V1B2    | tr E2RAC6 E2RAC6_CANFA | 57                     | 1.1                       | 0.3               | 5.7             | 1.1                     | 0.6         | 1.8       |

| Protein Name            | Gene Symbol | Accession Number       | Molecular Weight (kDa) | Total Spectrum Count_Mean |                   |                  | Total Spectrum Count_SD |             |           |
|-------------------------|-------------|------------------------|------------------------|---------------------------|-------------------|------------------|-------------------------|-------------|-----------|
|                         |             |                        |                        | Normal (N=3)              | Repair-only (N=3) | ASC+BMP 12 (N=3) | Normal                  | Repair-only | ASC+BMP12 |
| Uncharacterized protein | ATP6VIA     | tr E2QYG6 E2QYG6_CANFA | 68                     | 0.7                       | 3.1               | 5.7              | 1.3                     | 1.8         | 1.2       |
| Uncharacterized protein | ATIC        | tr F1P797 F1P797_CANFA | 65                     | 2.4                       | 2.9               | 6.7              | 0.8                     | 1.5         | 1.0       |
| Uncharacterized protein | ASS1        | tr E2QU08 E2QU08_CANFA | 47                     | 13.6                      | 0.0               | 0.0              | 5.1                     | 0.0         | 0.0       |
| Uncharacterized protein | ASPN        | tr E2RBW8 E2RBW8_CANFA | 42                     | 7.4                       | 20.1              | 10.1             | 1.2                     | 2.4         | 1.4       |
| Uncharacterized protein | ARPC2       | tr F1PAG6 F1PAG6_CANFA | 21                     | 0.7                       | 3.8               | 5.4              | 1.3                     | 0.6         | 2.3       |
| Uncharacterized protein | ARHGDIB     | tr E2RAL0 E2RAL0_CANFA | 23                     | 1.7                       | 6.1               | 6.6              | 0.5                     | 0.7         | 0.8       |
| Uncharacterized protein | ARF4        | tr J9P5N6 J9P5N6_CANFA | 21                     | 5.2                       | 12.7              | 10.8             | 1.8                     | 3.3         | 2.0       |
| Uncharacterized protein | AP2A2       | tr F1PDT7 F1PDT7_CANFA | 95                     | 0.0                       | 0.8               | 5.5              | 0.0                     | 0.7         | 0.5       |
| Uncharacterized protein | AP1B1       | tr E2RRJ6 E2RRJ6_CANFA | 104                    | 0.0                       | 1.4               | 5.6              | 0.0                     | 1.2         | 2.2       |
| Uncharacterized protein | ANGPTL7     | tr E2R2G1 E2R2G1_CANFA | 40                     | 54.8                      | 1.1               | 1.4              | 26.7                    | 0.2         | 1.5       |
| Uncharacterized protein | ALDH2       | tr F1PBJ8 F1PBJ8_CANFA | 57                     | 4.6                       | 7.6               | 15.1             | 0.4                     | 3.1         | 4.6       |
| Uncharacterized protein | ACTR3B      | tr J9PAK3 J9PAK3_CANFA | 42                     | 5.0                       | 4.9               | 10.8             | 3.0                     | 0.7         | 1.4       |
| Uncharacterized protein | ACTN1       | tr E2QY07 E2QY07_CANFA | 103                    | 4.4                       | 26.5              | 23.5             | 7.6                     | 3.4         | 2.6       |
| Uncharacterized protein | ACO2        | tr E2RCY8 E2RCY8_CANFA | 86                     | 1.7                       | 6.4               | 8.3              | 0.5                     | 1.1         | 3.7       |
| Uncharacterized protein | A2M         | tr F6UME0 F6UME0_CANFA | 165                    | 0.0                       | 21.4              | 8.6              | 0.0                     | 5.8         | 4.6       |
| Uncharacterized protein | A1BG        | tr F1PCK2 F1PCK2_CANFA | 58                     | 11.9                      | 31.6              | 18.7             | 2.2                     | 5.0         | 8.5       |
| Uncharacterized protein | N/A         | tr F1PWR2 F1PWR2_CANFA | 193                    | 22.7                      | 48.6              | 30.3             | 7.2                     | 8.9         | 10.2      |
| Uncharacterized protein | N/A         | tr F1PSX2 F1PSX2_CANFA | 11                     | 28.0                      | 39.4              | 30.8             | 5.1                     | 1.9         | 1.8       |
| Uncharacterized protein | N/A         | tr J9NSQ1 J9NSQ1_CANFA | 16                     | 25.7                      | 37.8              | 30.8             | 6.0                     | 2.7         | 2.3       |
| Uncharacterized protein | N/A         | tr F1Q406 F1Q406_CANFA | 59                     | 0.0                       | 2.5               | 4.9              | 0.0                     | 1.0         | 0.8       |
| Uncharacterized protein | VDAC1       | tr F1PC72 F1PC72_CANFA | 32                     | 6.9                       | 9.7               | 11.3             | 2.2                     | 1.7         | 0.8       |
| Uncharacterized protein | VCP         | tr E2RLQ9 E2RLQ9_CANFA | 91                     | 6.1                       | 15.0              | 25.2             | 3.8                     | 5.8         | 4.6       |
| Uncharacterized protein | TMEM3       | tr F1PPC9 F1PPC9_CANFA | 45                     | 11.5                      | 3.0               | 4.5              | 3.5                     | 1.1         | 1.9       |
| Uncharacterized protein | TMED10      | tr E2QYL0 E2QYL0_CANFA | 25                     | 1.1                       | 3.3               | 5.4              | 1.1                     | 0.8         | 1.6       |
| Uncharacterized protein | TGFBI       | tr F1PW10 F1PW10_CANFA | 71                     | 99.1                      | 58.9              | 36.4             | 34.9                    | 9.3         | 9.8       |
| Uncharacterized protein | SEPT9       | tr F1PB08 F1PB08_CANFA | 64                     | 0.6                       | 2.0               | 5.5              | 1.0                     | 1.7         | 1.8       |
| Uncharacterized protein | S100A9      | tr J9P732 J9P732_CANFA | 21                     | 0.0                       | 1.9               | 5.6              | 0.0                     | 1.2         | 0.4       |
| Uncharacterized protein | RPL5        | tr F1P7B0 F1P7B0_CANFA | 34                     | 0.4                       | 2.7               | 5.5              | 0.6                     | 1.1         | 1.3       |
| Uncharacterized protein | RAB1B       | tr F1PVP9 F1PVP9_CANFA | 22                     | 3.9                       | 8.6               | 8.1              | 2.0                     | 0.7         | 0.3       |
| Uncharacterized protein | PTBP        | tr F1PCJ7 F1PCJ7_CANFA | 60                     | 1.8                       | 6.9               | 8.8              | 1.7                     | 1.0         | 1.5       |
| Uncharacterized protein | PPA1        | tr F1PIJ6 F1PIJ6_CANFA | 32                     | 0.4                       | 4.5               | 4.9              | 0.6                     | 1.7         | 1.7       |
| Uncharacterized protein | PFN1        | tr F1Q3Y0 F1Q3Y0_CANFA | 11                     | 6.8                       | 17.3              | 20.2             | 5.2                     | 2.4         | 3.7       |
| Uncharacterized protein | PDXK        | tr J9P5E0 J9P5E0_CANFA | 32                     | 0.0                       | 5.9               | 5.0              | 0.0                     | 2.3         | 1.6       |
| Uncharacterized protein | MRC1        | tr F1PMH6 F1PMH6_CANFA | 166                    | 0.0                       | 3.1               | 13.8             | 0.0                     | 1.0         | 2.5       |
| Uncharacterized protein | MPO         | tr F1PQ52 F1PQ52_CANFA | 84                     | 0.0                       | 0.4               | 11.9             | 0.0                     | 0.6         | 4.1       |
| Uncharacterized protein | MFI2        | tr F1P7Y8 F1P7Y8_CANFA | 73                     | 6.1                       | 0.0               | 0.0              | 1.4                     | 0.0         | 0.0       |
| Uncharacterized protein | MFG8        | tr F1PFZ5 F1PFZ5_CANFA | 48                     | 66.1                      | 19.1              | 21.3             | 24.2                    | 4.9         | 7.5       |
| Uncharacterized protein | LRRCS9      | tr F1Q3G5 F1Q3G5_CANFA | 37                     | 0.0                       | 3.3               | 4.9              | 0.0                     | 0.8         | 1.7       |
| Uncharacterized protein | LMNB1       | tr J9P3G1 J9P3G1_CANFA | 54                     | 1.7                       | 8.5               | 14.3             | 3.0                     | 1.9         | 3.3       |
| Uncharacterized protein | KRT7        | tr F1PRB0 F1PRB0_CANFA | 51                     | 9.5                       | 5.7               | 5.5              | 2.4                     | 0.8         | 0.9       |
| Uncharacterized protein | ITIH4       | tr H9GWY3 H9GWY3_CANFA | 101                    | 1.1                       | 8.2               | 2.1              | 2.0                     | 1.4         | 1.5       |
| Uncharacterized protein | HSP90AA1    | tr F1PGY1 F1PGY1_CANFA | 73                     | 20.3                      | 18.1              | 25.4             | 1.8                     | 1.3         | 3.7       |
| Uncharacterized protein | HLA-DRB1    | tr F6V690 F6V690_CANFA | 31                     | 0.0                       | 2.5               | 7.4              | 0.0                     | 2.2         | 2.6       |
| Uncharacterized protein | HEXB        | tr F1Q1M8 F1Q1M8_CANFA | 52                     | 0.0                       | 3.0               | 4.6              | 0.0                     | 0.3         | 0.3       |
| Uncharacterized protein | HADHA       | tr F1PIP0 F1PIP0_CANFA | 82                     | 0.7                       | 3.4               | 6.8              | 1.3                     | 0.5         | 1.0       |
| Uncharacterized protein | FABP5       | tr F1PLY9 F1PLY9_CANFA | 13                     | 0.4                       | 1.8               | 4.8              | 0.6                     | 0.4         | 1.8       |
| Uncharacterized protein | ERP29       | tr J9P4L2 J9P4L2_CANFA | 42                     | 0.0                       | 2.3               | 6.6              | 0.0                     | 0.3         | 0.7       |

| Protein Name                       | Gene Symbol | Accession Number       | Molecular Weight (kDa) | Total Spectrum Count_Mean |                   |                 | Total Spectrum Count_SD |             |           |
|------------------------------------|-------------|------------------------|------------------------|---------------------------|-------------------|-----------------|-------------------------|-------------|-----------|
|                                    |             |                        |                        | Normal (N=3)              | Repair-only (N=3) | ASC+BMP12 (N=3) | Normal                  | Repair-only | ASC+BMP12 |
| Uncharacterized protein            | DLA-12      | tr F1PEZ8 F1PEZ8_CANFA | 40                     | 0.0                       | 2.0               | 7.6             | 0.0                     | 1.7         | 3.6       |
| Uncharacterized protein            | n/a         | tr J9NWX7 J9NWX7_CANFA | 15                     | 1.1                       | 3.3               | 4.8             | 1.1                     | 0.8         | 1.0       |
| Uncharacterized protein            | CLIC1       | tr F1PBH0 F1PBH0_CANFA | 28                     | 1.8                       | 6.9               | 11.2            | 1.7                     | 2.7         | 0.8       |
| Uncharacterized protein            | CFI         | tr E2R7A3 E2R7A3_CANFA | 63                     | 15.0                      | 16.3              | 11.1            | 0.7                     | 1.5         | 1.8       |
| Uncharacterized protein            | CAPZA1      | tr F1P7P3 F1P7P3_CANFA | 34                     | 5.8                       | 9.9               | 11.9            | 1.8                     | 1.3         | 1.0       |
| Uncharacterized protein            | ARPC4       | tr E2QWU0 E2QWU0_CANFA | 20                     | 1.5                       | 2.2               | 5.0             | 1.3                     | 0.9         | 0.2       |
| Uncharacterized protein            | APROB       | tr F1P8Z5 F1P8Z5_CANFA | 502                    | 0.0                       | 11.0              | 0.0             | 0.0                     | 5.9         | 0.0       |
| Uncharacterized protein            | ALOX15      | tr E2R7T5 E2R7T5_CANFA | 78                     | 0.4                       | 0.0               | 8.2             | 0.6                     | 0.0         | 2.7       |
| Uncharacterized protein            | AEBP1       | tr H9GW59 H9GW59_CANFA | 109                    | 2.6                       | 8.9               | 3.8             | 2.3                     | 2.9         | 0.1       |
| Uncharacterized protein            | KRT14       | tr F1Q0R0 F1Q0R0_CANFA | 52                     | 8.7                       | 0.0               | 0.0             | 1.1                     | 0.0         | 0.0       |
| Uncharacterized protein            | NNT         | tr F1PLG2 F1PLG2_CANFA | 114                    | 0.0                       | 0.0               | 4.2             | 0.0                     | 0.0         | 2.9       |
| Uncharacterized protein            | GSN         | tr E2QZK2 E2QZK2_CANFA | 86                     | 55.5                      | 42.0              | 31.5            | 13.3                    | 3.0         | 1.1       |
| Uncharacterized protein            | AK2         | tr E2RE39 E2RE39_CANFA | 27                     | 0.4                       | 4.6               | 3.8             | 0.6                     | 1.3         | 1.8       |
| Uncharacterized protein            | TUBB4A      | tr E2RFV2 E2RFV2_CANFA | 50                     | 6.9                       | 27.0              | 28.5            | 11.9                    | 1.5         | 4.6       |
| Uncharacterized protein            | NAPA        | tr E2RQE7 E2RQE7_CANFA | 33                     | 2.0                       | 1.2               | 4.9             | 1.1                     | 1.1         | 0.8       |
| Uncharacterized protein            | P4HA1       | tr E2RLB8 E2RLB8_CANFA | 61                     | 0.4                       | 3.0               | 4.5             | 0.6                     | 0.3         | 1.5       |
| Uncharacterized protein            | C1R         | tr F1P903 F1P903_CANFA | 80                     | 0.6                       | 4.9               | 1.8             | 1.0                     | 0.7         | 1.9       |
| Uncharacterized protein            | SEC23A      | tr E2QTA6 E2QTA6_CANFA | 87                     | 0.0                       | 4.6               | 2.8             | 0.0                     | 1.2         | 0.5       |
| Uncharacterized protein            | EPRS        | tr E2QUR2 E2QUR2_CANFA | 170                    | 0.0                       | 3.1               | 6.3             | 0.0                     | 2.8         | 0.4       |
| Uncharacterized protein            | C2          | tr E2RS79 E2RS79_CANFA | 86                     | 0.0                       | 7.9               | 1.0             | 0.0                     | 1.5         | 1.7       |
| Uncharacterized protein            | DPYSL2      | tr F1P9U4 F1P9U4_CANFA | 74                     | 35.8                      | 29.2              | 17.9            | 2.8                     | 3.6         | 0.7       |
| Uncharacterized protein (Fragment) | LMNB2       | tr F1Q1E1 F1Q1E1_CANFA | 61                     | 5.2                       | 0.0               | 1.5             | 1.4                     | 0.0         | 2.6       |
